# Supplementary material for: A new role for Zinc limitation in bacterial pathogenicity: modulation of α-hemolysin from uropathogenic Escherichia coli
Source: PubMed Central journal article supplement (PMC5916954; doi:10.1038/s41598-018-24964-1), 2018-04-25
Supplement: 41598_2018_24964_MOESM1_ESM.pdf [file 41598_2018_24964_MOESM1_ESM.pdf]

**A new role for Zinc limitation in bacterial pathogenicity: modulation of  $\alpha$ -hemolysin from uropathogenic *Escherichia coli*.**

Elsa Velasco, Suning Wang, Marianna Sanet, Jorge Fernández-Vázquez, Daniel Jové, Estibaliz Glaría, Annabel F. Valledor, Thomas V. O'Halloran and Carlos Balsalobre.

**Supplementary information**

|                                                                                                                                           |    |
|-------------------------------------------------------------------------------------------------------------------------------------------|----|
| Table S1. Primers used in this work                                                                                                       | 2  |
| Figure S1. Electrophoretic analysis of secreted protein extracts of J96, JFV16 (J96 $\Delta$ II) and JFV21 (J96 $\Delta$ I)               | 3  |
| Figure S2. <i>zur</i> mutation causes derepression of the <i>hly<sub>II</sub></i> operon expression in cultures grown up to mid-log phase | 4  |
| Figure S3. Alignment of the <i>hly<sub>II</sub></i> Zur binding site to the Zur consensus sequence                                        | 5  |
| Figure S4. Effect of $\Delta$ <i>zur</i> mutation in the expression of $\alpha$ -hemolysin in the UPEC strain CFT073                      | 6  |
| Figure S5. Pure Zur protein                                                                                                               | 7  |
| Figure S6. Original gel image used to create Fig. 1 c panel                                                                               | 8  |
| Figure S7. Original gel and blot images used to create Fig. 2 c panel                                                                     | 9  |
| Figure S8. Original gel images used to create Fig. 4 c panel                                                                              | 10 |
| Figure S9. Original gel image used to create Fig. 6d panel                                                                                | 11 |

**Table S1. Primers used in this study.**

|              |                                                                            |
|--------------|----------------------------------------------------------------------------|
| HlyA-P1      | 5'- ATCATATCCATTTTCAAAGTAATTTTGGCCGTGTTTTGTG<br>TAGGCTGGAGCTGCTTC -3'      |
| HlyA-P2      | 5'- CAAATTTAAAAGCACACACTGCAGTCTGCAAAGCAATCCG<br>CATATGAATATCCTCCTTAGT -3'  |
| Hly1-P1      | 5'- CCTGATTAATTCAACCCCTTATCTGACAGGGGTAGAAGT<br>GTAGGCTGGAGCTGCTTC -3'      |
| Hly1-P2-2    | 5'- ATTCAGCAATAACATCGGCCATTTTACTGGCGACATGCA<br>TATGAATATCCTCCTTAGT -3'     |
| Zur-P1       | 5'- CCATGTGCTTCAATAACATTATGCCGCAGGGCAAACCC<br>ATTGTGTAGGCTGGAGCTGCTTCG -3' |
| Zur-P2       | 5'- CACCCTGTTCTCGGCGTTTAAAGTGAGAACTATGGTAAAG<br>TCATATGAATATCCTCCTTA -3'   |
| Zur-P1.2     | 5' – TTACCGCTGGTAATTAATCCCTCCTGCCCGACATGTAC<br>AAGGGTGTAGGCTGGAGCTTCG -3'  |
| Zur-P2.1     | 5'- GCTACTATAGCATAACGAATATGCGATCAGGCAATGTGAC<br>CATATGAATATCCTCCTTAGT -3'  |
| 526          | 5'- CTGTATGGAACGGGATG -3'                                                  |
| HlyII-BamIII | 5'- GGATCCATGCCCAAGAACCTC -3'                                              |
| HlyII-GSP2   | 5'- TAAAAAGATCACATAAAGAAATGG -3'                                           |
| HlyII-GSP3   | 5'- CCTGCACCTTGCTTCATTTG -3'                                               |
| Zur-BamHI    | 5'- GGATCCCATCGGGGCAATCGAGAAAC -3'                                         |
| Zur-EcoRI    | 5'- GAATTCCAGGAACGCTACGGTTATC -3'                                          |

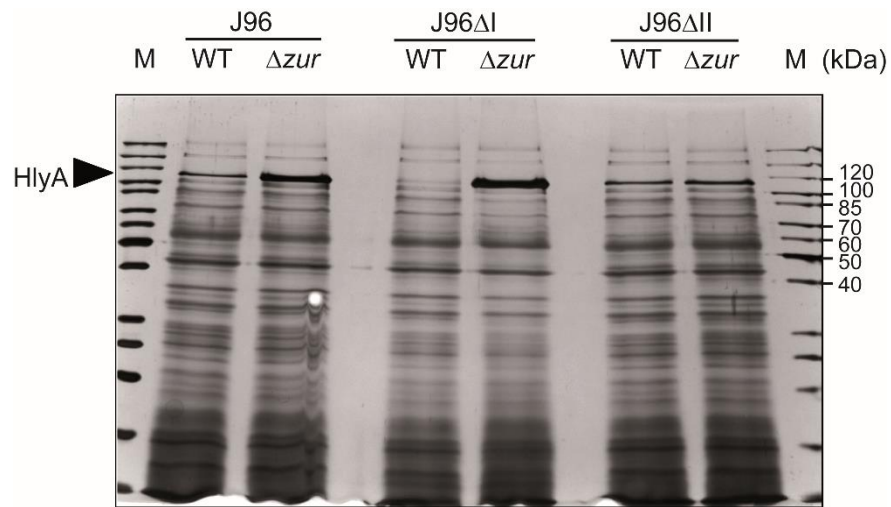

**Figure S1. Electrophoretic analysis of secreted protein extracts of J96, JFV16 (J96 $\Delta$ II) and JFV21 (J96 $\Delta$ I).** Bacterial cultures were grown in LB at 37 °C up to late-log phase ( $OD_{600nm}$  of 1.0). Secreted extracts were analyzed in silver stained 10 % SDS-PAGE. The band corresponding to HlyA is indicated with an arrowhead. Lanes M: molecular mass markers (size indicated in kDa).

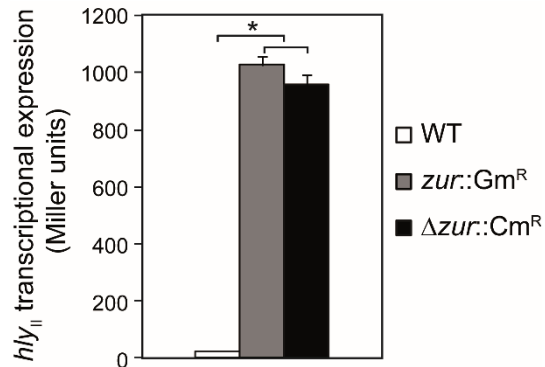

**Figure S2. *zur* mutation causes derepression of the *hly<sub>II</sub>* operon expression in cultures grown up to mid-log phase.** Transcriptional expression of the *hly<sub>II</sub>* operon from cultures of the JFV3 strain (J96 *hly<sub>II</sub>::lacZ*) and its *zur::Gm<sup>R</sup>* and *zur::Cm<sup>R</sup>* derivatives. Cultures were grown in LB at 37°C up to mid-log phase (OD<sub>600nm</sub> of 0.4).  $\beta$ -galactosidase activity (Miller units) was determined in three independent cultures. Mean values with standard deviations are plotted. \* P < 0.05, ANOVA with Tukey's multiple comparisons test.

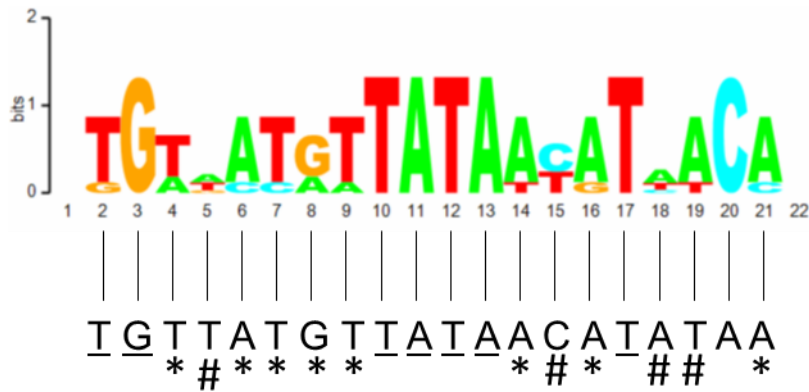

**Figure S3. Alignment of the *hlyII* Zur binding site to the Zur consensus sequence<sup>1</sup>.** The *hlyII* Zur binding site was aligned with the sequence logo representation of the template strain in Zur-DNA recognition based on the following *E. coli* Zur operators: *znuA*, *znuC*, *zinT*, and *I31p*. Underlined bases indicate identical to the consensus residues, bases with \* are identical to the most predominant residue and bases labelled with # are identical with no predominant residues.

<sup>1</sup> Gilston, B. A. *et al.* Structural and Mechanistic Basis of Zinc Regulation Across the *E. coli* Zur Regulon. *PLoS Biol.* **12**, e1001987 (2014).

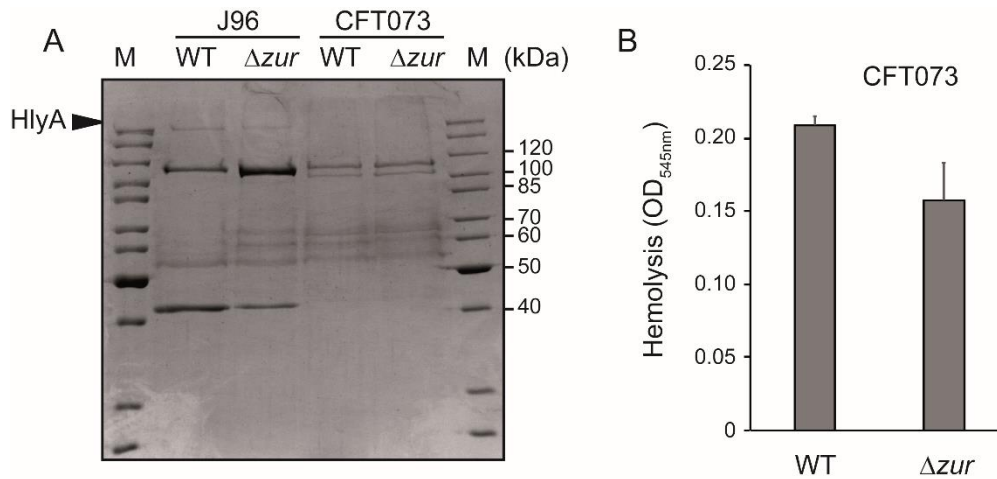

**Figure S4. Effect of  $\Delta zur$  mutation in the expression of  $\alpha$ -hemolysin in the UPEC strain CFT073.** A. Electrophoretic analysis of secreted protein extracts of J96, EV27 (J96 $\Delta zur$ ), CFT073 and DJ1 (CFT073 $\Delta zur$ ). Bacterial cultures were grown in LB at 37 °C up to late-log phase (OD<sub>600nm</sub> of 1.0). Secreted extracts were analyzed in Coomassie blue stained 10 % SDS-PAGE. The band corresponding to HlyA is indicated with an arrowhead. Lanes M: molecular mass markers (size indicated in kDa). B. Hemolysis after 1 hour infection of sheep blood cell suspensions with CFT073 and DJ1 (CFT073 $\Delta zur$ ). The release of haemoglobin was monitored by OD<sub>545nm</sub>.

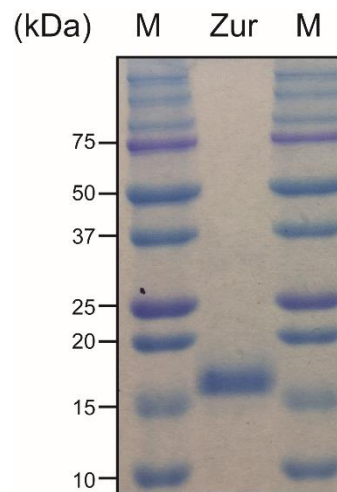

**Figure S5. Pure Zur protein.** 5  $\mu\text{g}$  of pure Zur protein was analysed in 12% SDS-PAGE, stained by SimpleBlue safe stain (Invitrogen). Lanes M: molecular mass markers (size indicated in kDa).

Coomassie stained gel

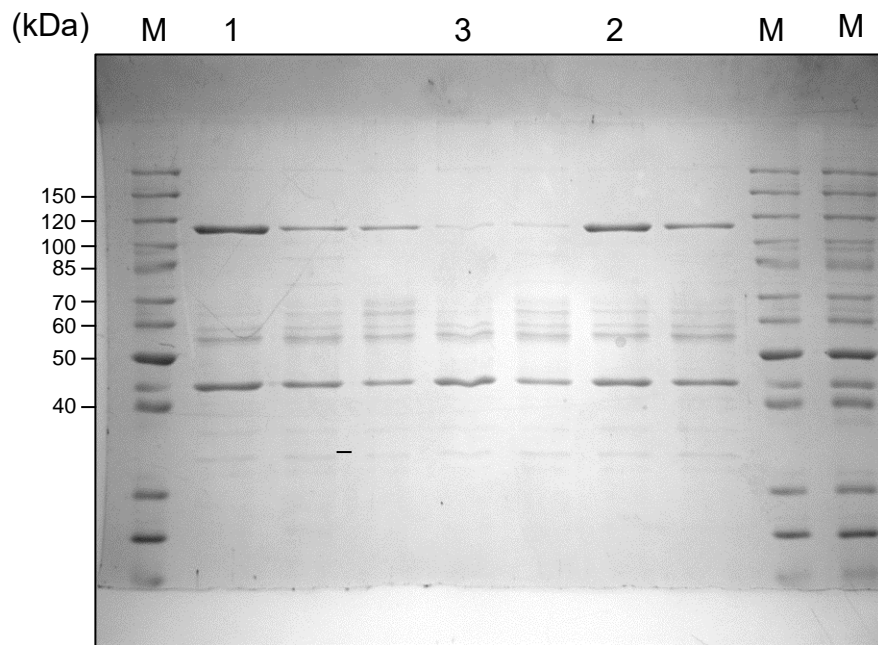

Lane 1: Cell-free extract from J96  
Lane 2: Cell-free extract from J96 $\Delta$ II  
Lane 3: Cell-free extract from J96 $\Delta$ I  
Lanes M: molecular mass markers (size indicated in kDa).

**Figure S6. Original gel image used to create Fig. 1c panel.**



Coomassie stained gel

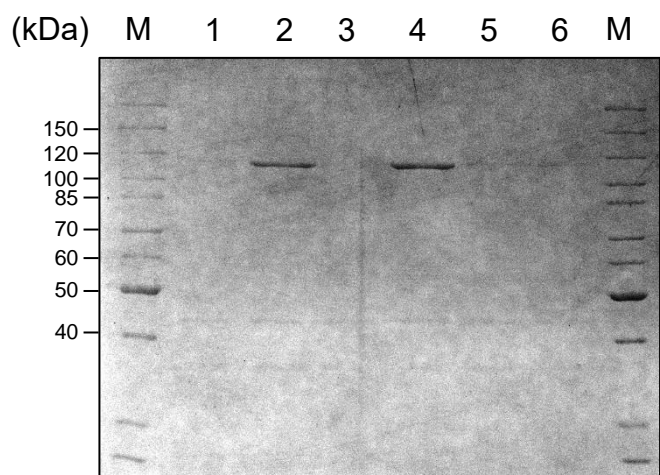

Lane 1: Cell-free extract from J96  
Lane 2: Cell-free extract from J96 $\Delta$ zur  
Lane 3: Cell-free extract from J96 $\Delta$ I  
Lane 4: Cell-free extract from J96 $\Delta$ I $\Delta$ zur  
Lane 5: Cell-free extract from J96 $\Delta$ II  
Lane 6: Cell-free extract from J96 $\Delta$ II $\Delta$ zur  
Lanes M: molecular mass markers  
(size indicated in kDa).

Western blots anti-HlyA

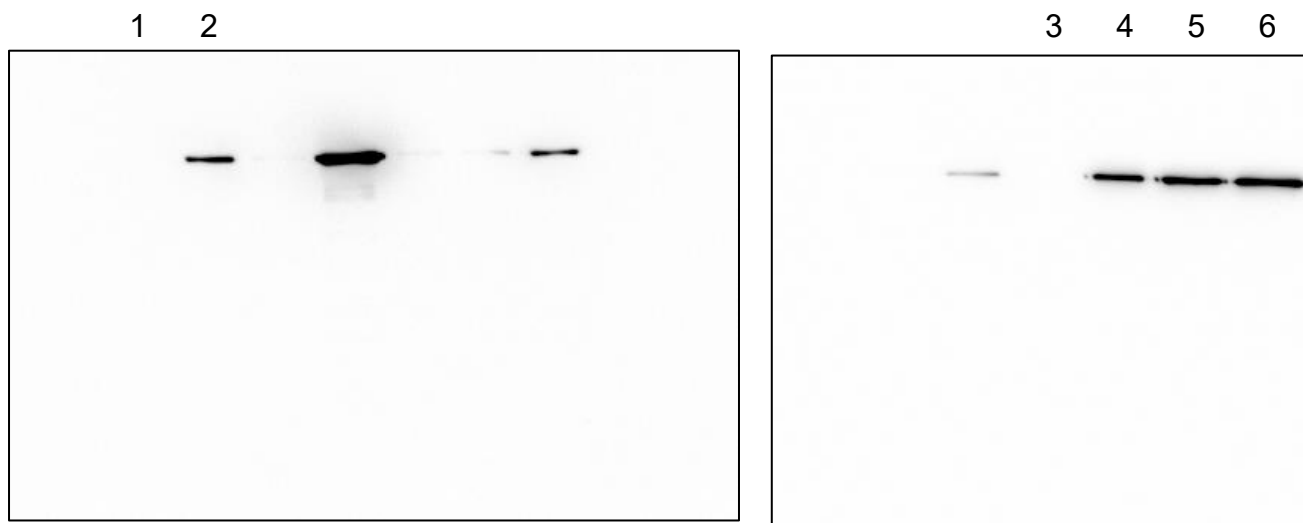

Lane 1: Cell-free extract from J96  
Lane 2: Cell-free extract from J96 $\Delta$ zur  
Lane 3: Cell-free extract from J96 $\Delta$ I  
Lane 4: Cell-free extract from J96 $\Delta$ I $\Delta$ zur  
Lane 5: Cell-free extract from J96 $\Delta$ II  
Lane 6: Cell-free extract from J96 $\Delta$ II $\Delta$ zur

**Figure S7. Original gel and blot images used to create Fig. 2c panel.**

Coomassie stained gels

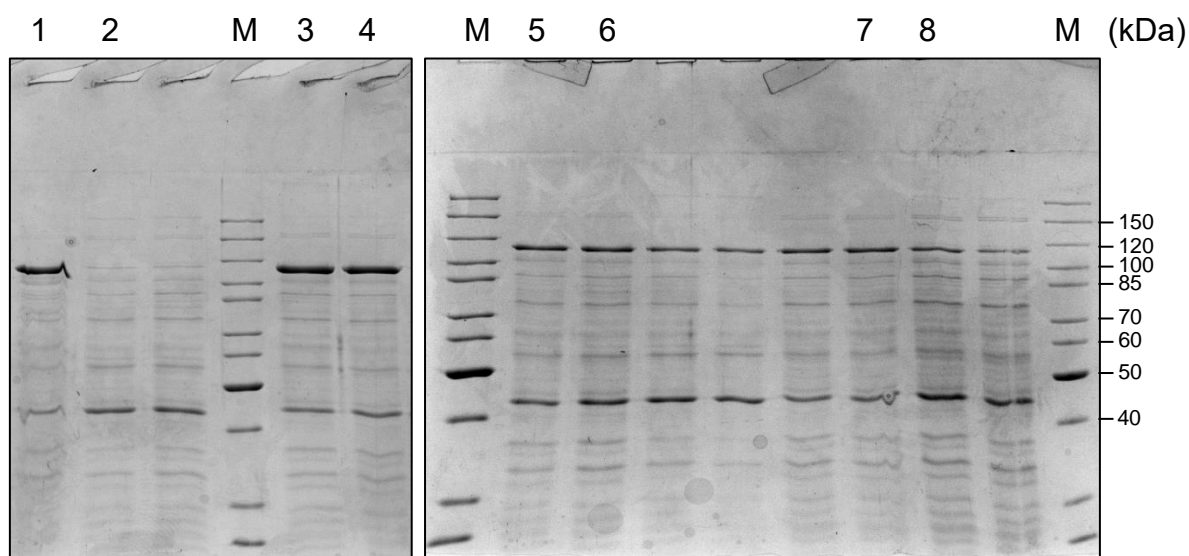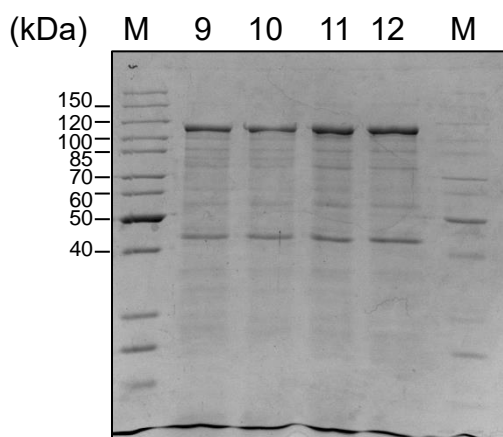

- Lane 1: Cell-free extract from J96 $\Delta$ I (- ZnCl<sub>2</sub>)
- Lane 2: Cell-free extract from J96 $\Delta$ I (+ ZnCl<sub>2</sub>)
- Lane 3: Cell-free extract from J96 $\Delta$ I $\Delta$ zur (- ZnCl<sub>2</sub>)
- Lane 4: Cell-free extract from J96 $\Delta$ I $\Delta$ zur (+ ZnCl<sub>2</sub>)
- Lane 5: Cell-free extract from J96 $\Delta$ II (- ZnCl<sub>2</sub>)
- Lane 6: Cell-free extract from J96 $\Delta$ II (+ ZnCl<sub>2</sub>)
- Lane 7: Cell-free extract from J96 $\Delta$ II $\Delta$ zur (- ZnCl<sub>2</sub>)
- Lane 8: Cell-free extract from J96 $\Delta$ II $\Delta$ zur (+ ZnCl<sub>2</sub>)
- Lane 9: Cell-free extract from J96 (- ZnCl<sub>2</sub>)
- Lane 10: Cell-free extract from J96 (+ ZnCl<sub>2</sub>)
- Lane 11: Cell-free extract from J96 $\Delta$ zur (- ZnCl<sub>2</sub>)
- Lane 12: Cell-free extract from J96 $\Delta$ zur (+ ZnCl<sub>2</sub>)
- Lanes M: molecular mass markers (size indicated in kDa).

**Figure S8. Original gel images used to create Fig. 4c panel.**

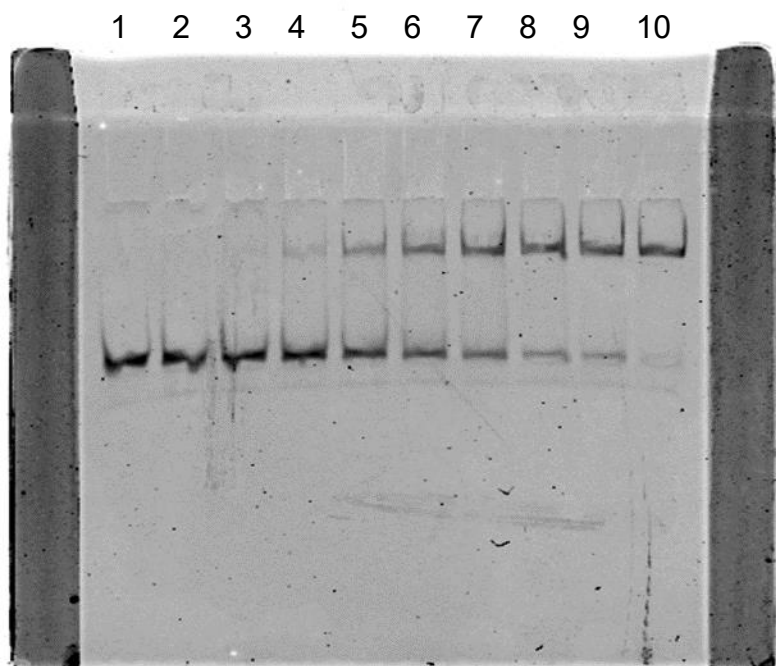

Lane1: absence of Zur

Lane 2: 0.015 nM Zur dimer

Lane 3: 0.03 nM Zur dimer

Lane 4: 0.05 nM Zur dimer

Lane 5: 0.1 nM Zur dimer

Lane 6: 0.15 nM Zur dimer

Lane 7: 0.2 nM Zur dimer

Lane 8: 0.3 nM Zur dimer

Lane 9: 0.35 nM Zur dimer

Lane 10: 0.9 nM Zur dimer

**Figure S9. Original gel image used to create Fig. 6d panel.**
